# Supplementary material for: Antimonene: a monolayer material for ultraviolet optical nanodevices
Source: Royal Society of Chemistry journal article supplement (doi:10.1039/c6tc01913g), 2016-01-01
Supplement: c6tc01913g1.pdf [file c6tc01913g1.pdf]

**Electronic Supplementary Information (ESI)**

**Antimonene: a monolayer material for ultraviolet optic nanodevices**

D. Singh,<sup>a</sup> S. K. Gupta<sup>b</sup>, Y. Sonvane<sup>a</sup> and I. Lukačević<sup>c</sup>

---

<sup>a</sup> Department of Applied Physics, S. V. National Institute of Technology, Surat, 395007, India.

<sup>b</sup> Department of Physics and Electronics, St. Xavier's College, Ahmedabad, 380009, India.

<sup>c</sup> Department of Physics, University J. J. Strossmayer, 31000 Osijek, Croatia.

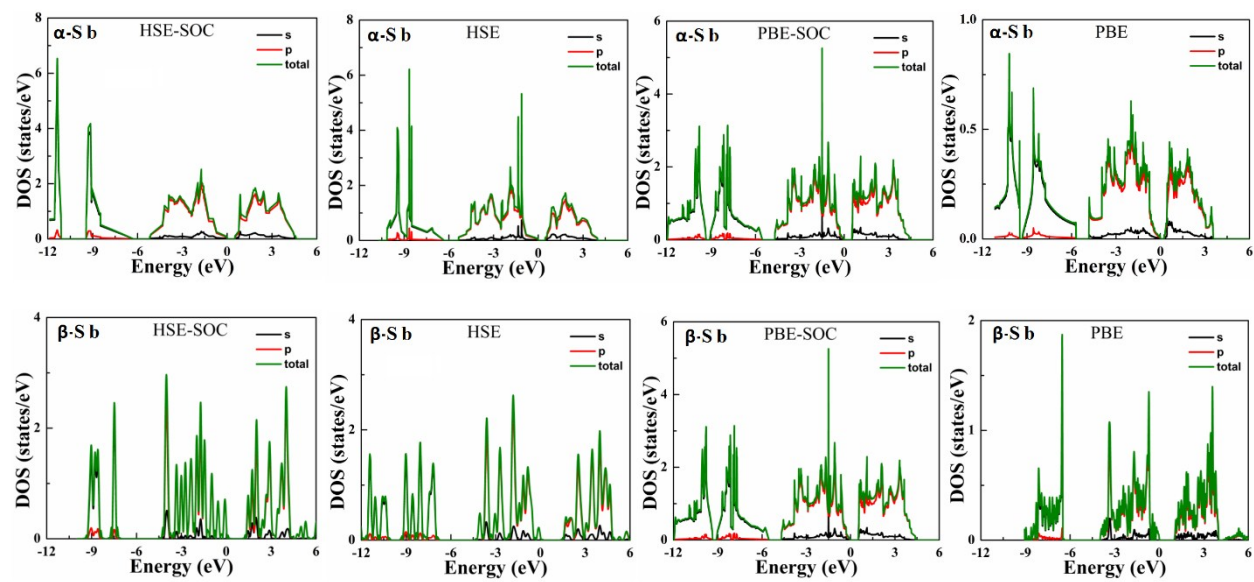

**Fig. S1** Comparison of the electronic densities of states (DOS) of two antimonene allotropes  $\alpha$ -Sb (up) and  $\beta$ -Sb (down) obtained using PBE and HSE06 functionals with and without the spin-orbit coupling.

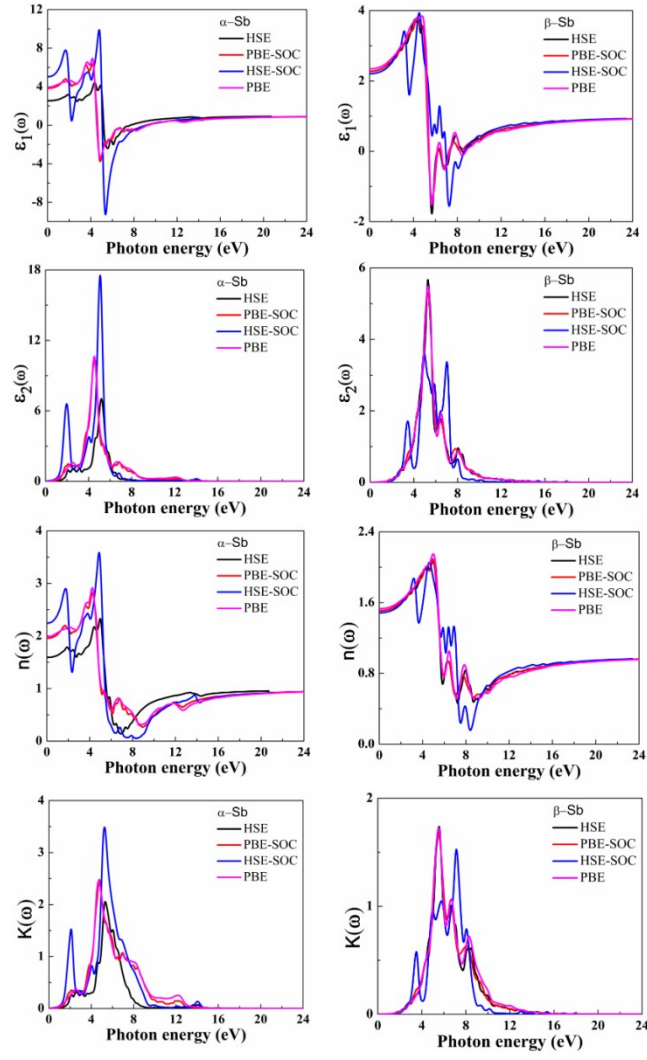

**Fig. S2** The real and imaginary parts of complex dielectric function along with the refractive index  $n(\omega)$  and extinction coefficient  $K(\omega)$  of  $\alpha$ -Sb (left) and  $\beta$ -Sb (right) monolayers obtained using PBE and HSE06 functionals with and without the spin-orbit coupling.

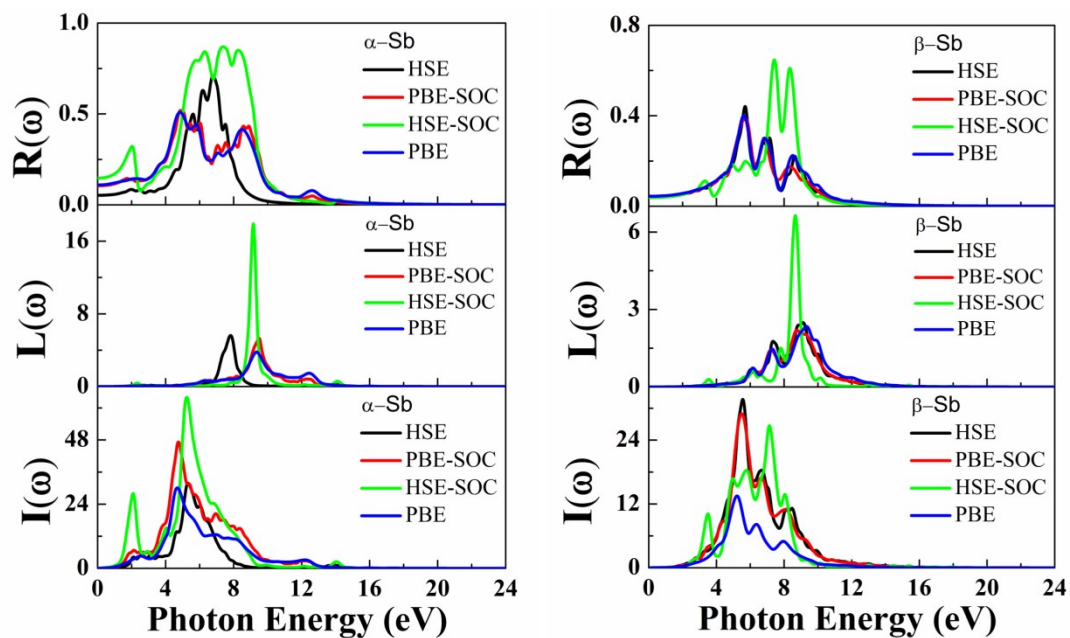

**Fig. S3** The absorption coefficient  $I(\omega)$ , energy loss spectrum  $L(\omega)$  and reflectivity  $R(\omega)$  of  $\alpha$ -Sb (left) and  $\beta$ -Sb (right) monolayers obtained using PBE and HSE06 functionals with and without the spin-orbit coupling. The unit of absorption coefficient is  $10^5/\text{cm}$ .
